# Supplementary material for: Spin-polarized p-block antimony/bismuth single-atom catalysts on defect-free rutile TiO2(110) substrate for highly efficient CO oxidation
Source: Royal Society of Chemistry journal article supplement (doi:10.1039/d4cp00352g), 2024-01-01

## Supporting Information

### Spin-polarized *p*-block Antimony/Bismuth Single-atom Catalysts on Defect-free Rutile TiO<sub>2</sub>(110) Substrate for High-efficient CO Oxidation

Jinlei Shi<sup>1,2</sup>, Fengyuan Yang,<sup>2</sup> Xingju Zhao<sup>2</sup>, Xiaoyan Ren<sup>2</sup>, Yanan Tang<sup>1\*</sup> and Shunfang Li<sup>2\*</sup>

<sup>1</sup>College of Physics and Electronic Engineering, Zhengzhou Normal University, Zhengzhou 450044, China

<sup>2</sup>School of Physics and Microelectronics, Zhengzhou University, Zhengzhou, Henan 450001, China

\*Corresponding author.

E-mail: yntang2010@163.com; E-mail: sflizzu@zzu.edu.cn

#### The file includes:

**Figure S1.** Pair interactions of two Sb(Bi) adatoms on the stoichiometric TiO<sub>2</sub>(110).

**Figure S2.** Geometric structures, thermodynamic and kinetic properties for Bi single atom and the Bi-O<sub>2</sub> unit with a molecular O<sub>2</sub> adsorb on the Bi reactive site on defect-free TiO<sub>2</sub>(110).

**Figure S3.** CO oxidation on the SbO<sub>2</sub> species stabilized on the defect-free TiO<sub>2</sub>(110).

**Figure S4.** Possible MEP of CO oxidation on SbO<sub>3</sub> species on TiO<sub>2</sub>(110).

**Figure S5.** Local projected electronic density of states analysis of Sb<sub>1</sub>, SbO<sub>2</sub>, SbO<sub>4</sub>, SbO<sub>3</sub> and SbO<sub>3</sub>-O<sub>2</sub> species on TiO<sub>2</sub>(110).

**Figure S6.** MEP for CO oxidation on the BiO<sub>4</sub> *p*-SACs stabilized on the defect-free TiO<sub>2</sub>(110) substrate.

**Figure S7.** Schematic view of the MEP of O<sub>2</sub> dissociated of SbO<sub>2</sub> species on defect-free TiO<sub>2</sub>(110) surface.

**Figure S8.** Oxidation states analysis of Sb(Bi)-SAC on defect-free TiO<sub>2</sub>(110) surface.

**Figure S9.** Local projected electronic density of states analysis on TiO<sub>2</sub>(110) and Sb<sub>1</sub>/TiO<sub>2</sub>(110).

**Figure S10.** Analysis of charge transfer between the SbO<sub>x</sub> system and TiO<sub>2</sub>.

**Table S1.** The parameters of magnetic moments analysis for key steps of O<sub>2</sub> dissociation and CO oxidation on the Sb-*p*-SACs

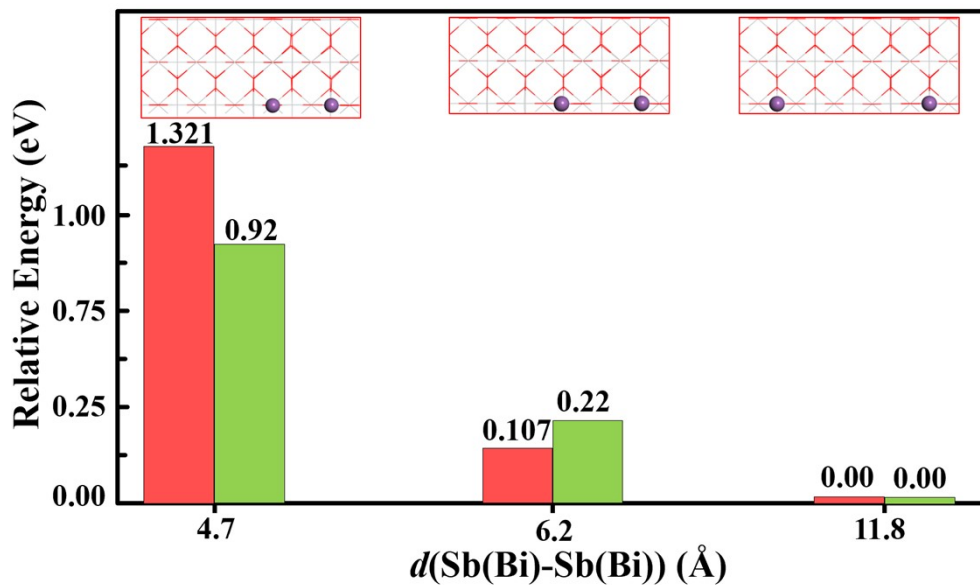

**Figure S1. Pair interactions of two Sb(Bi) adatoms on the stoichiometric  $\text{TiO}_2(110)$ .** Energy profiles of two Sb or Bi adatoms on defect-free  $\text{TiO}_2(110)$  substrate, as a function of Sb(Bi)-Sb(Bi) distance  $d(\text{Sb(Bi)-Sb(Bi)})$ , the red and green bars correspond to the Sb and Bi cases, respectively.

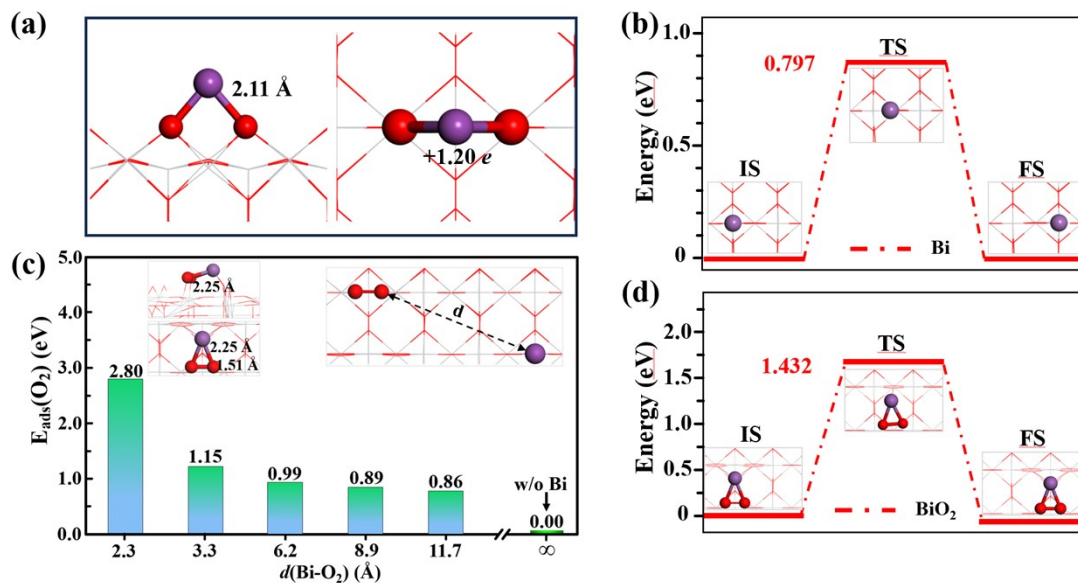

**Figure S2. Geometric structures, thermodynamic and kinetic properties for Bi single atom and the Bi-O<sub>2</sub> unit with a molecular O<sub>2</sub> adsorb on the Bi reactive site on defect-free TiO<sub>2</sub>(110).** (a) Top and side view of the optimized most stable structure of Bi single atoms on defect-free rutile TiO<sub>2</sub>(110) surface shown in ball and stick model. (b) Minimum energy path (MEP) for Bi diffusion along the oxygen bridging row. (c) Calculated relative adsorption energies of the O<sub>2</sub> molecule on the Bi/TiO<sub>2</sub>(110) complex with different Bi-O<sub>2</sub> distance ( $d(\text{Bi-O}_2)$ ) in  $c(8 \times 2)$  supercell, the insert image on the left side refers to the side and top view of the most stable BiO<sub>2</sub> motif. (d) MEP for BiO<sub>2</sub> motif diffusion on TiO<sub>2</sub>(110), the initial state, transition state and final state are labeled as IS, TS and FS, respectively.

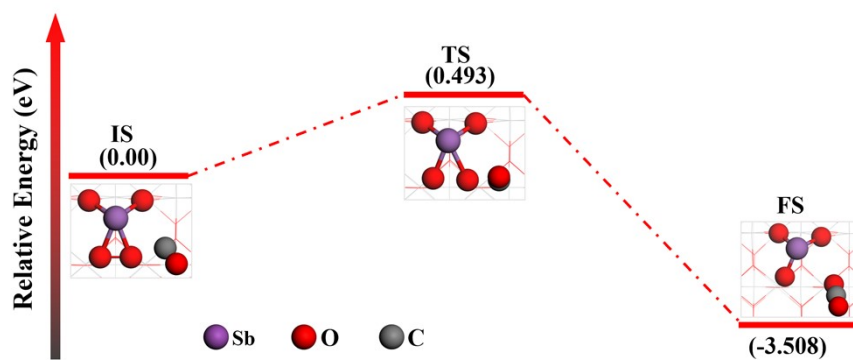

**Figure S3.** CO oxidation on the SbO<sub>2</sub> species stabilized on the defect-free TiO<sub>2</sub>(110). The adsorbed O<sub>2</sub> molecule attacked by the incoming CO and release a CO<sub>2</sub> molecule.

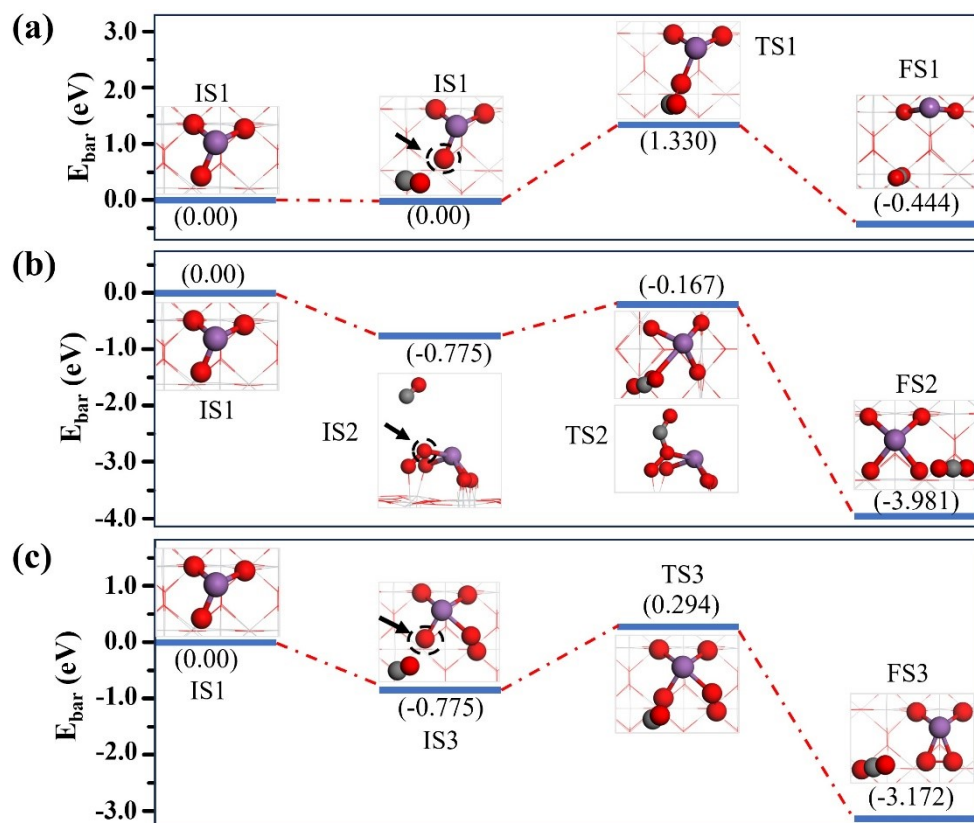

**Figure S4. Possible MEP of CO oxidation on  $\text{SbO}_3$  species on defect-free  $\text{TiO}_2(110)$  substrate. (a) CO attacking the remained O atom of  $\text{SbO}_3$  species on the substrate. (b) CO oxidation by attacking the protruding O atom of the adsorbed  $\text{O}_2$  in  $\text{SbO}_3\text{-O}_2$  species. (c) CO attacking the remained O atom in  $\text{SbO}_3\text{-O}_2$  species on defect-free  $\text{TiO}_2(110)$  substrate.**

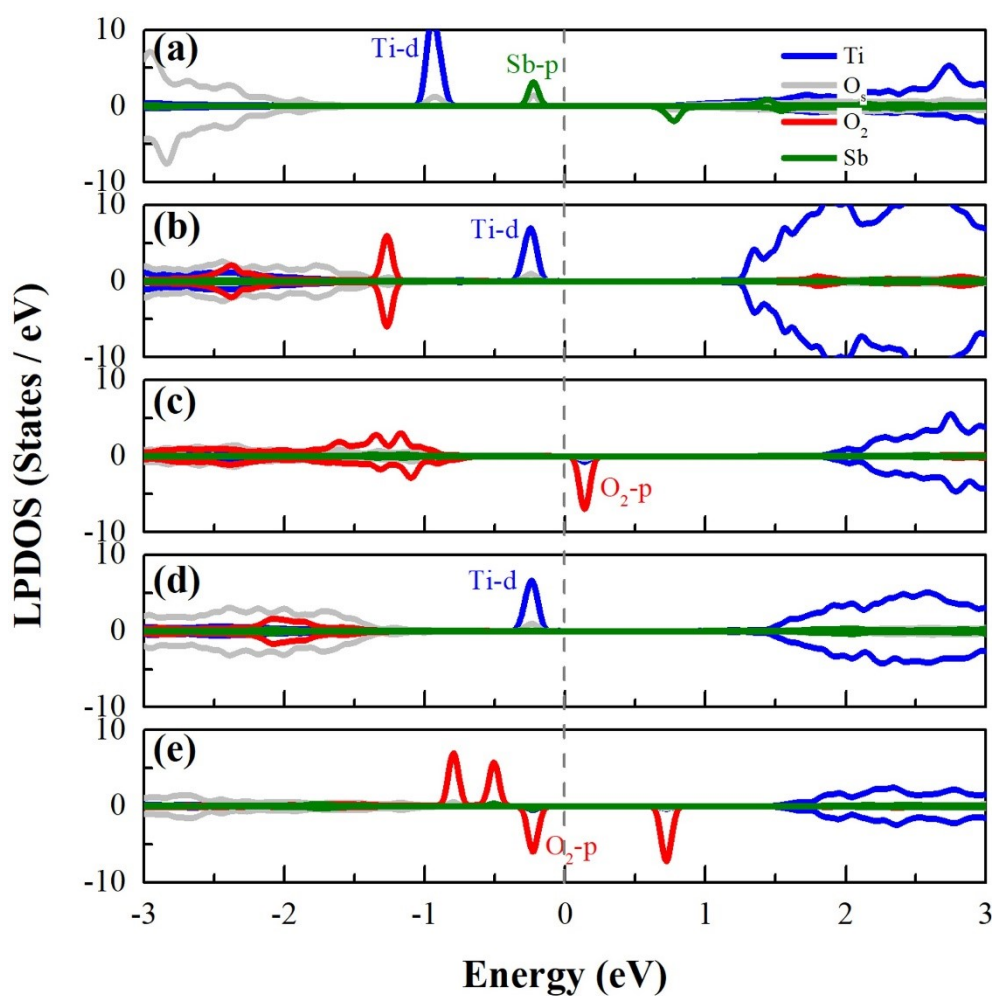

**Figure S5. Local projected electronic density of states (LPDOS) analysis.** (a) LPDOS of Sb/TiO<sub>2</sub>(110). (b) LPDOS of SbO<sub>2</sub> species on TiO<sub>2</sub>(110). (c) LPDOS of SbO<sub>4</sub> motif on TiO<sub>2</sub>(110). (d) LPDOS of SbO<sub>3</sub> species on TiO<sub>2</sub>(110). (e) LPDOS of SbO<sub>3</sub>-O<sub>2</sub> species on TiO<sub>2</sub>(110).

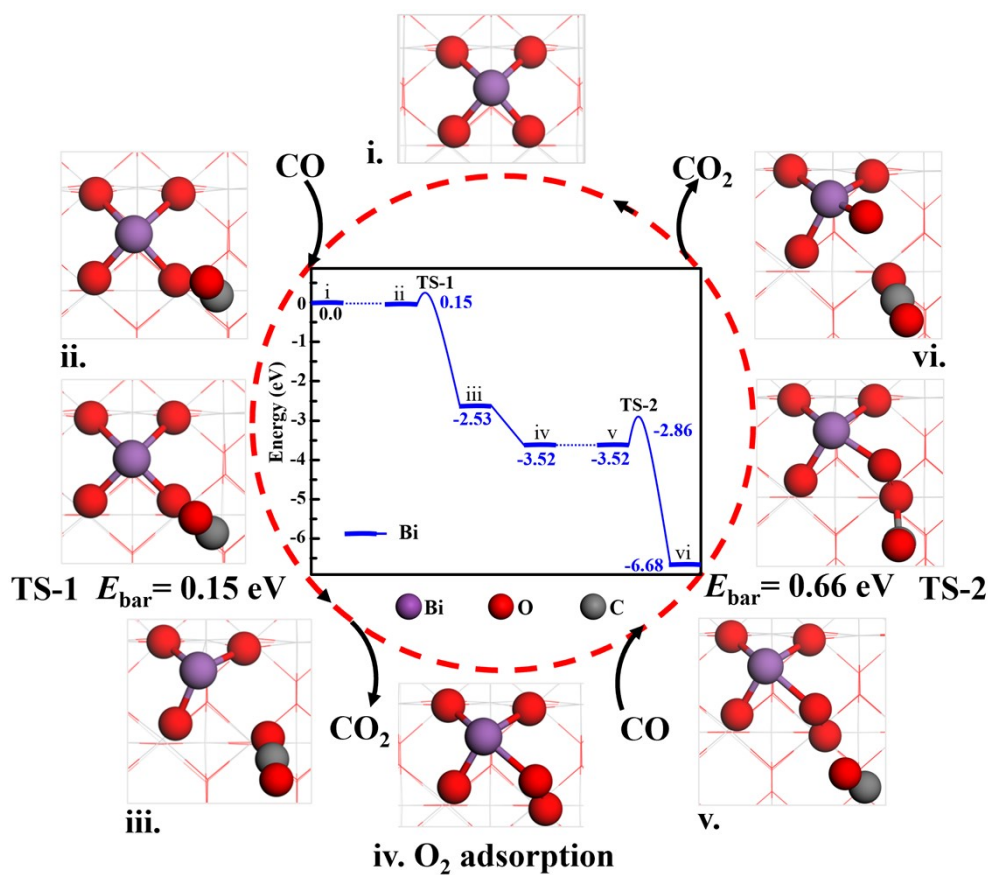

Figure S6. MEP for CO oxidation on the BiO<sub>4</sub> p-SACs stabilized on the defect-free TiO<sub>2</sub>(110) substrate.

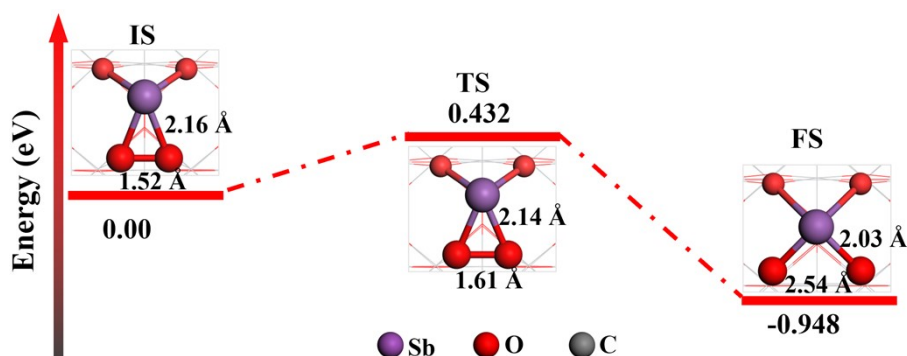

**Figure S7. Schematic view of the MEP of O<sub>2</sub> dissociated of SbO<sub>2</sub> species on defect-free TiO<sub>2</sub>(110) surface.**

Here, the bond length change of O-O and Sb-O during the O<sub>2</sub> dissociation are displayed. Additionally, the optimized coordinates of the structures of O<sub>2</sub> dissociation on the Sb/TiO<sub>2</sub>(110) complex.

The optimized coordinates of IS state are as below:

|        |               |               |               |  |
|--------|---------------|---------------|---------------|--|
| Ti     | 0             | Sb            |               |  |
| 1.0    |               |               |               |  |
|        | 11.8360004425 | 0.0000000000  | 0.0000000000  |  |
|        | 0.0000000000  | 13.1861276627 | 0.0000000000  |  |
|        | 0.0000000000  | 0.0000000000  | 27.4730949402 |  |
| Ti     | 0             | Sb            |               |  |
| 64     | 130           | 1             |               |  |
| Direct |               |               |               |  |
|        | 0.926475525   | 0.544925094   | 0.450963795   |  |
|        | 0.925976872   | 0.045937024   | 0.448198676   |  |
|        | 0.800546288   | 0.794900417   | 0.438472569   |  |
|        | 0.800564289   | 0.295366347   | 0.436988056   |  |
|        | 0.680711687   | 0.545323968   | 0.448846132   |  |
|        | 0.675927162   | 0.046942100   | 0.448365331   |  |
|        | 0.551120877   | 0.796560526   | 0.437594950   |  |
|        | 0.548886538   | 0.298211008   | 0.441716909   |  |
|        | 0.425605059   | 0.549167633   | 0.434479713   |  |
|        | 0.425858587   | 0.046301719   | 0.447755069   |  |
|        | 0.300547034   | 0.796653688   | 0.437593758   |  |
|        | 0.302911282   | 0.298004031   | 0.441640735   |  |
|        | 0.170556605   | 0.545471489   | 0.449451149   |  |
|        | 0.175763980   | 0.046953898   | 0.448146671   |  |
|        | 0.050971352   | 0.794503152   | 0.438334793   |  |
|        | 0.051142436   | 0.295875877   | 0.436867476   |  |
|        | 0.802136362   | 0.545754969   | 0.323469609   |  |
|        | 0.801292539   | 0.045838229   | 0.323703468   |  |



|              |              |              |
|--------------|--------------|--------------|
| 0. 551759541 | 0. 546493113 | 0. 319912195 |
| 0. 550952911 | 0. 045617986 | 0. 323702186 |
| 0. 298352957 | 0. 546401918 | 0. 320021063 |
| 0. 300433367 | 0. 045643941 | 0. 323626339 |
| 0. 050757367 | 0. 545917749 | 0. 322992325 |
| 0. 050791569 | 0. 045812085 | 0. 323607475 |
| 0. 925543547 | 0. 795259058 | 0. 318967402 |
| 0. 925536811 | 0. 296287119 | 0. 317529261 |
| 0. 676250458 | 0. 796353817 | 0. 318334192 |
| 0. 673673213 | 0. 295145780 | 0. 318757296 |
| 0. 425922453 | 0. 796374083 | 0. 318198830 |
| 0. 425960869 | 0. 295559555 | 0. 321448326 |
| 0. 175865576 | 0. 795748174 | 0. 318238467 |
| 0. 178533852 | 0. 295871288 | 0. 318691671 |
| 0. 925742924 | 0. 545547366 | 0. 197687998 |
| 0. 925742924 | 0. 045547336 | 0. 197687998 |
| 0. 800742924 | 0. 795547366 | 0. 197687998 |
| 0. 800742924 | 0. 295547336 | 0. 197687998 |
| 0. 675742924 | 0. 545547366 | 0. 197687998 |
| 0. 675742924 | 0. 045547336 | 0. 197687998 |
| 0. 550742924 | 0. 795547366 | 0. 197687998 |
| 0. 550742924 | 0. 295547336 | 0. 197687998 |
| 0. 425742894 | 0. 545547366 | 0. 197687998 |
| 0. 425742894 | 0. 045547336 | 0. 197687998 |
| 0. 300742894 | 0. 795547366 | 0. 197687998 |
| 0. 300742894 | 0. 295547336 | 0. 197687998 |
| 0. 175742909 | 0. 545547366 | 0. 197687998 |
| 0. 175742909 | 0. 045547336 | 0. 197687998 |
| 0. 050742902 | 0. 795547366 | 0. 197687998 |
| 0. 050742902 | 0. 295547336 | 0. 197687998 |
| 0. 925742924 | 0. 795547366 | 0. 077696726 |
| 0. 925742924 | 0. 295547336 | 0. 077696726 |
| 0. 800742924 | 0. 545547366 | 0. 077696726 |
| 0. 800742924 | 0. 045547336 | 0. 077696726 |
| 0. 675742924 | 0. 795547366 | 0. 077696726 |
| 0. 675742924 | 0. 295547336 | 0. 077696726 |
| 0. 550742924 | 0. 545547366 | 0. 077696726 |
| 0. 550742924 | 0. 045547336 | 0. 077696726 |
| 0. 425742894 | 0. 795547366 | 0. 077696726 |
| 0. 425742894 | 0. 295547336 | 0. 077696726 |
| 0. 300742894 | 0. 545547366 | 0. 077696726 |
| 0. 300742894 | 0. 045547336 | 0. 077696726 |
| 0. 175742909 | 0. 795547366 | 0. 077696726 |
| 0. 175742909 | 0. 295547336 | 0. 077696726 |

|             |             |             |
|-------------|-------------|-------------|
| 0.050742902 | 0.545547366 | 0.077696726 |
| 0.050742902 | 0.045547336 | 0.077696726 |
| 0.797948778 | 0.545753479 | 0.493465304 |
| 0.801133633 | 0.045481477 | 0.490662038 |
| 0.537116885 | 0.535880506 | 0.491810620 |
| 0.550365031 | 0.047126364 | 0.490373254 |
| 0.315328658 | 0.535928547 | 0.492118716 |
| 0.301227063 | 0.047167096 | 0.490256310 |
| 0.052997679 | 0.545697153 | 0.494299263 |
| 0.050846722 | 0.045469407 | 0.490621120 |
| 0.925969660 | 0.888572514 | 0.449085861 |
| 0.925544143 | 0.700676382 | 0.451486230 |
| 0.925602794 | 0.390469313 | 0.450453818 |
| 0.926072776 | 0.202134341 | 0.448614925 |
| 0.676199138 | 0.889191508 | 0.449650645 |
| 0.673711300 | 0.700527191 | 0.452368587 |
| 0.677086771 | 0.392464876 | 0.449021429 |
| 0.676067948 | 0.203169391 | 0.449599743 |
| 0.425857872 | 0.888502836 | 0.450893998 |
| 0.425917804 | 0.700132608 | 0.447899342 |
| 0.425843835 | 0.397668034 | 0.432029992 |
| 0.426062942 | 0.200844690 | 0.443027675 |
| 0.175107718 | 0.889240563 | 0.449093074 |
| 0.177944347 | 0.700760901 | 0.452934504 |
| 0.174825802 | 0.392385125 | 0.449488968 |
| 0.175387070 | 0.203162685 | 0.449136913 |
| 0.800496042 | 0.547172368 | 0.398145705 |
| 0.800691843 | 0.045956094 | 0.394987524 |
| 0.557709694 | 0.554190695 | 0.394195348 |
| 0.551809788 | 0.042368967 | 0.394795984 |
| 0.293611795 | 0.554409325 | 0.394649357 |
| 0.300206393 | 0.042457249 | 0.394712597 |
| 0.051153671 | 0.547236085 | 0.399585187 |
| 0.050859854 | 0.045971520 | 0.394965887 |
| 0.799295247 | 0.795743346 | 0.369556934 |
| 0.800531507 | 0.294378519 | 0.368468165 |
| 0.551155686 | 0.795878470 | 0.368731856 |
| 0.554438412 | 0.293630958 | 0.368968099 |
| 0.301411390 | 0.796936274 | 0.368825495 |
| 0.298299968 | 0.292328149 | 0.369065046 |
| 0.051519416 | 0.793428898 | 0.369337320 |
| 0.050403621 | 0.296738058 | 0.368275970 |
| 0.925789475 | 0.946199775 | 0.321025044 |
| 0.919207931 | 0.647932649 | 0.321770489 |

|              |              |              |
|--------------|--------------|--------------|
| 0. 919141769 | 0. 444162399 | 0. 321685314 |
| 0. 925831497 | 0. 144535735 | 0. 320263505 |
| 0. 676145494 | 0. 946123183 | 0. 320237696 |
| 0. 676057398 | 0. 645381749 | 0. 319595218 |
| 0. 675195158 | 0. 447683513 | 0. 320849955 |
| 0. 675934851 | 0. 143955410 | 0. 320056558 |
| 0. 426073194 | 0. 946144760 | 0. 320103794 |
| 0. 426626742 | 0. 645362020 | 0. 320168227 |
| 0. 426678389 | 0. 448504329 | 0. 321998835 |
| 0. 426098734 | 0. 143960759 | 0. 320971429 |
| 0. 175362363 | 0. 946289241 | 0. 320286244 |
| 0. 181249559 | 0. 648665965 | 0. 319440275 |
| 0. 182239786 | 0. 444396198 | 0. 320874065 |
| 0. 175547466 | 0. 143874198 | 0. 320079833 |
| 0. 800769389 | 0. 796935380 | 0. 272868961 |
| 0. 799658239 | 0. 294993132 | 0. 272483706 |
| 0. 551069558 | 0. 795573115 | 0. 272736579 |
| 0. 549260855 | 0. 296484739 | 0. 273231030 |
| 0. 301730692 | 0. 797063828 | 0. 272576869 |
| 0. 303575099 | 0. 295140833 | 0. 273100197 |
| 0. 049927291 | 0. 795164108 | 0. 272979349 |
| 0. 051194150 | 0. 296836078 | 0. 272608161 |
| 0. 800742924 | 0. 545547366 | 0. 244532660 |
| 0. 800742924 | 0. 045547336 | 0. 244532660 |
| 0. 550742924 | 0. 545547366 | 0. 244532660 |
| 0. 550742924 | 0. 045547336 | 0. 244532660 |
| 0. 300742894 | 0. 545547366 | 0. 244532660 |
| 0. 300742894 | 0. 045547336 | 0. 244532660 |
| 0. 050742902 | 0. 545547366 | 0. 244532660 |
| 0. 050742902 | 0. 045547336 | 0. 244532660 |
| 0. 925742924 | 0. 893147469 | 0. 197687998 |
| 0. 925742924 | 0. 697947204 | 0. 197687998 |
| 0. 925742924 | 0. 393147469 | 0. 197687998 |
| 0. 925742924 | 0. 197947204 | 0. 197687998 |
| 0. 675742924 | 0. 893147469 | 0. 197687998 |
| 0. 675742924 | 0. 697947204 | 0. 197687998 |
| 0. 675742924 | 0. 393147469 | 0. 197687998 |
| 0. 675742924 | 0. 197947204 | 0. 197687998 |
| 0. 425742894 | 0. 893147469 | 0. 197687998 |
| 0. 425742894 | 0. 697947204 | 0. 197687998 |
| 0. 425742894 | 0. 393147469 | 0. 197687998 |
| 0. 425742894 | 0. 197947204 | 0. 197687998 |
| 0. 175742909 | 0. 893147469 | 0. 197687998 |
| 0. 175742909 | 0. 697947204 | 0. 197687998 |

|              |              |              |
|--------------|--------------|--------------|
| 0. 175742909 | 0. 393147469 | 0. 197687998 |
| 0. 175742909 | 0. 197947204 | 0. 197687998 |
| 0. 800742924 | 0. 545547366 | 0. 150843352 |
| 0. 800742924 | 0. 045547336 | 0. 150843352 |
| 0. 550742924 | 0. 545547366 | 0. 150843352 |
| 0. 550742924 | 0. 045547336 | 0. 150843352 |
| 0. 300742894 | 0. 545547366 | 0. 150843352 |
| 0. 300742894 | 0. 045547336 | 0. 150843352 |
| 0. 050742902 | 0. 545547366 | 0. 150843352 |
| 0. 050742902 | 0. 045547336 | 0. 150843352 |
| 0. 800742924 | 0. 795547366 | 0. 124541380 |
| 0. 800742924 | 0. 295547336 | 0. 124541380 |
| 0. 550742924 | 0. 795547366 | 0. 124541380 |
| 0. 550742924 | 0. 295547336 | 0. 124541380 |
| 0. 300742894 | 0. 795547366 | 0. 124541380 |
| 0. 300742894 | 0. 295547336 | 0. 124541380 |
| 0. 050742902 | 0. 795547366 | 0. 124541380 |
| 0. 050742902 | 0. 295547336 | 0. 124541380 |
| 0. 925742924 | 0. 947947204 | 0. 077696726 |
| 0. 925742924 | 0. 643147469 | 0. 077696726 |
| 0. 925742924 | 0. 447947204 | 0. 077696726 |
| 0. 925742924 | 0. 143147469 | 0. 077696726 |
| 0. 675742924 | 0. 947947204 | 0. 077696726 |
| 0. 675742924 | 0. 643147469 | 0. 077696726 |
| 0. 675742924 | 0. 447947204 | 0. 077696726 |
| 0. 675742924 | 0. 143147469 | 0. 077696726 |
| 0. 425742894 | 0. 947947204 | 0. 077696726 |
| 0. 425742894 | 0. 643147469 | 0. 077696726 |
| 0. 425742894 | 0. 447947204 | 0. 077696726 |
| 0. 425742894 | 0. 143147469 | 0. 077696726 |
| 0. 175742909 | 0. 947947204 | 0. 077696726 |
| 0. 175742909 | 0. 643147469 | 0. 077696726 |
| 0. 175742909 | 0. 447947204 | 0. 077696726 |
| 0. 175742909 | 0. 143147469 | 0. 077696726 |
| 0. 800742924 | 0. 795547366 | 0. 030852064 |
| 0. 800742924 | 0. 295547336 | 0. 030852064 |
| 0. 550742924 | 0. 795547366 | 0. 030852064 |
| 0. 550742924 | 0. 295547336 | 0. 030852064 |
| 0. 300742894 | 0. 795547366 | 0. 030852064 |
| 0. 300742894 | 0. 295547336 | 0. 030852064 |
| 0. 050742902 | 0. 795547366 | 0. 030852064 |
| 0. 050742902 | 0. 295547336 | 0. 030852064 |
| 0. 362184435 | 0. 323853284 | 0. 516202807 |
| 0. 490298122 | 0. 323805571 | 0. 516136467 |

0. 426329046                      0. 469491422                      0. 538757920

The optimized coordinates of TS state are as below:

Ti    0    Sb

1. 0

|                |                |                |
|----------------|----------------|----------------|
| 11. 8360004425 | 0. 0000000000  | 0. 0000000000  |
| 0. 0000000000  | 13. 1861276627 | 0. 0000000000  |
| 0. 0000000000  | 0. 0000000000  | 27. 4730949402 |

Ti    0    Sb

64 130    1

Direct

|              |              |              |
|--------------|--------------|--------------|
| 0. 925822079 | 0. 545014977 | 0. 450258732 |
| 0. 925880790 | 0. 046096418 | 0. 448115766 |
| 0. 800617576 | 0. 794916809 | 0. 438495338 |
| 0. 800619006 | 0. 295610756 | 0. 436811924 |
| 0. 680134356 | 0. 545517683 | 0. 448636413 |
| 0. 675892115 | 0. 047075558 | 0. 448236585 |
| 0. 551093817 | 0. 796588421 | 0. 437644392 |
| 0. 548887610 | 0. 298425317 | 0. 442572206 |
| 0. 425785005 | 0. 549080610 | 0. 434282452 |
| 0. 425862700 | 0. 046592318 | 0. 447533846 |
| 0. 300538301 | 0. 796655953 | 0. 437634259 |
| 0. 302913517 | 0. 298334360 | 0. 442599952 |
| 0. 171546176 | 0. 545587957 | 0. 448906034 |
| 0. 175740510 | 0. 047099996 | 0. 448084921 |
| 0. 050984040 | 0. 794654787 | 0. 438418895 |
| 0. 051129490 | 0. 295929879 | 0. 436736614 |
| 0. 800856650 | 0. 545885086 | 0. 322857648 |
| 0. 800866663 | 0. 045837935 | 0. 323430836 |
| 0. 551862776 | 0. 546647310 | 0. 319380760 |
| 0. 550958097 | 0. 045634083 | 0. 323425710 |
| 0. 299816340 | 0. 546655774 | 0. 319471538 |
| 0. 300818473 | 0. 045682471 | 0. 323394716 |
| 0. 050741516 | 0. 545919180 | 0. 322845280 |
| 0. 050793096 | 0. 045836817 | 0. 323397845 |
| 0. 925797045 | 0. 796362460 | 0. 318994284 |
| 0. 925840199 | 0. 295109928 | 0. 317370623 |
| 0. 676229835 | 0. 796760380 | 0. 318375438 |
| 0. 673160136 | 0. 294844151 | 0. 318828285 |
| 0. 425947517 | 0. 796788812 | 0. 318269730 |
| 0. 425964415 | 0. 295344740 | 0. 322070837 |
| 0. 175530910 | 0. 796769083 | 0. 318340868 |
| 0. 178672612 | 0. 294868171 | 0. 318807155 |

|              |              |              |
|--------------|--------------|--------------|
| 0. 925742924 | 0. 545547366 | 0. 197687998 |
| 0. 925742924 | 0. 045547336 | 0. 197687998 |
| 0. 800742924 | 0. 795547366 | 0. 197687998 |
| 0. 800742924 | 0. 295547336 | 0. 197687998 |
| 0. 675742924 | 0. 545547366 | 0. 197687998 |
| 0. 675742924 | 0. 045547336 | 0. 197687998 |
| 0. 550742924 | 0. 795547366 | 0. 197687998 |
| 0. 550742924 | 0. 295547336 | 0. 197687998 |
| 0. 425742894 | 0. 545547366 | 0. 197687998 |
| 0. 425742894 | 0. 045547336 | 0. 197687998 |
| 0. 300742894 | 0. 795547366 | 0. 197687998 |
| 0. 300742894 | 0. 295547336 | 0. 197687998 |
| 0. 175742909 | 0. 545547366 | 0. 197687998 |
| 0. 175742909 | 0. 045547336 | 0. 197687998 |
| 0. 050742902 | 0. 795547366 | 0. 197687998 |
| 0. 050742902 | 0. 295547336 | 0. 197687998 |
| 0. 925742924 | 0. 795547366 | 0. 077696726 |
| 0. 925742924 | 0. 295547336 | 0. 077696726 |
| 0. 800742924 | 0. 545547366 | 0. 077696726 |
| 0. 800742924 | 0. 045547336 | 0. 077696726 |
| 0. 675742924 | 0. 795547366 | 0. 077696726 |
| 0. 675742924 | 0. 295547336 | 0. 077696726 |
| 0. 550742924 | 0. 545547366 | 0. 077696726 |
| 0. 550742924 | 0. 045547336 | 0. 077696726 |
| 0. 425742894 | 0. 795547366 | 0. 077696726 |
| 0. 425742894 | 0. 295547336 | 0. 077696726 |
| 0. 300742894 | 0. 545547366 | 0. 077696726 |
| 0. 300742894 | 0. 045547336 | 0. 077696726 |
| 0. 175742909 | 0. 795547366 | 0. 077696726 |
| 0. 175742909 | 0. 295547336 | 0. 077696726 |
| 0. 050742902 | 0. 545547366 | 0. 077696726 |
| 0. 050742902 | 0. 045547336 | 0. 077696726 |
| 0. 798503160 | 0. 545872271 | 0. 493024975 |
| 0. 801094115 | 0. 045371424 | 0. 490574360 |
| 0. 536988080 | 0. 535782635 | 0. 491410166 |
| 0. 550274432 | 0. 047201186 | 0. 490228772 |
| 0. 314995021 | 0. 535892308 | 0. 491577119 |
| 0. 301280200 | 0. 047219787 | 0. 490133286 |
| 0. 052959114 | 0. 545857131 | 0. 493157387 |
| 0. 050779030 | 0. 045356974 | 0. 490526289 |
| 0. 925921440 | 0. 888641894 | 0. 448993772 |
| 0. 925690830 | 0. 700570226 | 0. 451321959 |
| 0. 925727427 | 0. 390843093 | 0. 450076103 |
| 0. 925999284 | 0. 202308238 | 0. 448546022 |

|              |              |              |
|--------------|--------------|--------------|
| 0. 676287413 | 0. 889277756 | 0. 449426472 |
| 0. 673810661 | 0. 700537980 | 0. 452422887 |
| 0. 677700996 | 0. 393006772 | 0. 448663384 |
| 0. 676447451 | 0. 203314468 | 0. 449590743 |
| 0. 425785482 | 0. 888653696 | 0. 450637430 |
| 0. 425819159 | 0. 700140834 | 0. 447832108 |
| 0. 425771683 | 0. 397913128 | 0. 431429684 |
| 0. 425924838 | 0. 200884059 | 0. 442246109 |
| 0. 175165996 | 0. 889340520 | 0. 448985517 |
| 0. 177878723 | 0. 700654030 | 0. 452815145 |
| 0. 174132437 | 0. 393024862 | 0. 448976666 |
| 0. 175127104 | 0. 203320384 | 0. 449253470 |
| 0. 800576329 | 0. 547594070 | 0. 397560894 |
| 0. 800776362 | 0. 046089802 | 0. 394809037 |
| 0. 558012068 | 0. 554835916 | 0. 393898308 |
| 0. 551934659 | 0. 042283360 | 0. 394621938 |
| 0. 293384612 | 0. 554979682 | 0. 394046187 |
| 0. 299925923 | 0. 042366616 | 0. 394522995 |
| 0. 051289357 | 0. 547645271 | 0. 397556901 |
| 0. 050813075 | 0. 046104144 | 0. 394760698 |
| 0. 800129414 | 0. 794484556 | 0. 369416147 |
| 0. 801400483 | 0. 295563996 | 0. 368192077 |
| 0. 551180243 | 0. 795514047 | 0. 368737102 |
| 0. 554828584 | 0. 294036686 | 0. 369063437 |
| 0. 300620139 | 0. 795734644 | 0. 368716031 |
| 0. 297054023 | 0. 293716699 | 0. 369037330 |
| 0. 051488318 | 0. 793415248 | 0. 369353354 |
| 0. 050272550 | 0. 296630710 | 0. 368137658 |
| 0. 925871491 | 0. 945965707 | 0. 320998073 |
| 0. 925714791 | 0. 644649267 | 0. 321530163 |
| 0. 925744772 | 0. 447625726 | 0. 321621060 |
| 0. 925886989 | 0. 144801676 | 0. 320135176 |
| 0. 676310360 | 0. 946034193 | 0. 320248365 |
| 0. 677003384 | 0. 645400882 | 0. 319488168 |
| 0. 676045656 | 0. 447849423 | 0. 320855230 |
| 0. 676072061 | 0. 144080013 | 0. 319961697 |
| 0. 425894350 | 0. 946058393 | 0. 320144653 |
| 0. 425822854 | 0. 645372152 | 0. 320069313 |
| 0. 425827444 | 0. 448807120 | 0. 321997255 |
| 0. 425926834 | 0. 144145757 | 0. 320956081 |
| 0. 175239339 | 0. 946006954 | 0. 320267081 |
| 0. 174614891 | 0. 645269096 | 0. 319400102 |
| 0. 175531775 | 0. 448008418 | 0. 320861310 |
| 0. 175468698 | 0. 144136682 | 0. 319959879 |

|              |              |              |
|--------------|--------------|--------------|
| 0. 801621139 | 0. 795943379 | 0. 273153633 |
| 0. 800379694 | 0. 296226621 | 0. 272800326 |
| 0. 551043272 | 0. 795388103 | 0. 272905976 |
| 0. 548872769 | 0. 296851277 | 0. 273520440 |
| 0. 300780922 | 0. 795877039 | 0. 272912771 |
| 0. 302987456 | 0. 296458840 | 0. 273519635 |
| 0. 049979903 | 0. 795317948 | 0. 273171514 |
| 0. 051287033 | 0. 296893090 | 0. 272813171 |
| 0. 800742924 | 0. 545547366 | 0. 244532660 |
| 0. 800742924 | 0. 045547336 | 0. 244532660 |
| 0. 550742924 | 0. 545547366 | 0. 244532660 |
| 0. 550742924 | 0. 045547336 | 0. 244532660 |
| 0. 300742894 | 0. 545547366 | 0. 244532660 |
| 0. 300742894 | 0. 045547336 | 0. 244532660 |
| 0. 050742902 | 0. 545547366 | 0. 244532660 |
| 0. 050742902 | 0. 045547336 | 0. 244532660 |
| 0. 925742924 | 0. 893147469 | 0. 197687998 |
| 0. 925742924 | 0. 697947204 | 0. 197687998 |
| 0. 925742924 | 0. 393147469 | 0. 197687998 |
| 0. 925742924 | 0. 197947204 | 0. 197687998 |
| 0. 675742924 | 0. 893147469 | 0. 197687998 |
| 0. 675742924 | 0. 697947204 | 0. 197687998 |
| 0. 675742924 | 0. 393147469 | 0. 197687998 |
| 0. 675742924 | 0. 197947204 | 0. 197687998 |
| 0. 425742894 | 0. 893147469 | 0. 197687998 |
| 0. 425742894 | 0. 697947204 | 0. 197687998 |
| 0. 425742894 | 0. 393147469 | 0. 197687998 |
| 0. 425742894 | 0. 197947204 | 0. 197687998 |
| 0. 175742909 | 0. 893147469 | 0. 197687998 |
| 0. 175742909 | 0. 697947204 | 0. 197687998 |
| 0. 175742909 | 0. 393147469 | 0. 197687998 |
| 0. 175742909 | 0. 197947204 | 0. 197687998 |
| 0. 800742924 | 0. 545547366 | 0. 150843352 |
| 0. 800742924 | 0. 045547336 | 0. 150843352 |
| 0. 550742924 | 0. 545547366 | 0. 150843352 |
| 0. 550742924 | 0. 045547336 | 0. 150843352 |
| 0. 300742894 | 0. 545547366 | 0. 150843352 |
| 0. 300742894 | 0. 045547336 | 0. 150843352 |
| 0. 050742902 | 0. 545547366 | 0. 150843352 |
| 0. 050742902 | 0. 045547336 | 0. 150843352 |
| 0. 800742924 | 0. 795547366 | 0. 124541380 |
| 0. 800742924 | 0. 295547336 | 0. 124541380 |
| 0. 550742924 | 0. 795547366 | 0. 124541380 |
| 0. 550742924 | 0. 295547336 | 0. 124541380 |



|             |             |             |
|-------------|-------------|-------------|
| 0.300742894 | 0.795547366 | 0.124541380 |
| 0.300742894 | 0.295547336 | 0.124541380 |
| 0.050742902 | 0.795547366 | 0.124541380 |
| 0.050742902 | 0.295547336 | 0.124541380 |
| 0.925742924 | 0.947947204 | 0.077696726 |
| 0.925742924 | 0.643147469 | 0.077696726 |
| 0.925742924 | 0.447947204 | 0.077696726 |
| 0.925742924 | 0.143147469 | 0.077696726 |
| 0.675742924 | 0.947947204 | 0.077696726 |
| 0.675742924 | 0.643147469 | 0.077696726 |
| 0.675742924 | 0.447947204 | 0.077696726 |
| 0.675742924 | 0.143147469 | 0.077696726 |
| 0.425742894 | 0.947947204 | 0.077696726 |
| 0.425742894 | 0.643147469 | 0.077696726 |
| 0.425742894 | 0.447947204 | 0.077696726 |
| 0.425742894 | 0.143147469 | 0.077696726 |
| 0.175742909 | 0.947947204 | 0.077696726 |
| 0.175742909 | 0.643147469 | 0.077696726 |
| 0.175742909 | 0.447947204 | 0.077696726 |
| 0.175742909 | 0.143147469 | 0.077696726 |
| 0.800742924 | 0.795547366 | 0.030852064 |
| 0.800742924 | 0.295547336 | 0.030852064 |
| 0.550742924 | 0.795547366 | 0.030852064 |
| 0.550742924 | 0.295547336 | 0.030852064 |
| 0.300742894 | 0.795547366 | 0.030852064 |
| 0.300742894 | 0.295547336 | 0.030852064 |
| 0.050742902 | 0.795547366 | 0.030852064 |
| 0.050742902 | 0.295547336 | 0.030852064 |
| 0.357934982 | 0.323898613 | 0.515647709 |
| 0.494240910 | 0.323861659 | 0.515619338 |
| 0.426210463 | 0.466500998 | 0.538203001 |

The optimized coordinates of FS state are as below:

Ti 0 Sb

1. 0

|               |               |               |
|---------------|---------------|---------------|
| 11.8360004425 | 0.0000000000  | 0.0000000000  |
| 0.0000000000  | 13.1861276627 | 0.0000000000  |
| 0.0000000000  | 0.0000000000  | 27.4730949402 |

Ti 0 Sb

64 130 1

Direct

|             |             |             |
|-------------|-------------|-------------|
| 0.925800979 | 0.545996428 | 0.449146330 |
| 0.925813735 | 0.047415335 | 0.448245466 |

|              |              |              |
|--------------|--------------|--------------|
| 0. 800455630 | 0. 795728207 | 0. 438114226 |
| 0. 800967634 | 0. 296462476 | 0. 435232013 |
| 0. 677803516 | 0. 546513259 | 0. 448355228 |
| 0. 676062763 | 0. 048843805 | 0. 448343992 |
| 0. 550759852 | 0. 798183918 | 0. 437510043 |
| 0. 550235212 | 0. 300479501 | 0. 446630031 |
| 0. 425762504 | 0. 549789548 | 0. 436525345 |
| 0. 425868303 | 0. 050188113 | 0. 447859913 |
| 0. 300721526 | 0. 798227310 | 0. 437517077 |
| 0. 301469028 | 0. 300446182 | 0. 446716636 |
| 0. 173812404 | 0. 546474278 | 0. 448405892 |
| 0. 175600991 | 0. 048860963 | 0. 448333114 |
| 0. 051022857 | 0. 795758128 | 0. 438126445 |
| 0. 050776992 | 0. 296436727 | 0. 435285479 |
| 0. 800818026 | 0. 546727002 | 0. 323698103 |
| 0. 800799370 | 0. 046429627 | 0. 323880851 |
| 0. 551590085 | 0. 547319233 | 0. 320728034 |
| 0. 550843000 | 0. 046498403 | 0. 324038625 |
| 0. 299919456 | 0. 547275901 | 0. 320718646 |
| 0. 300821006 | 0. 046484776 | 0. 324039519 |
| 0. 050662406 | 0. 546708405 | 0. 323728055 |
| 0. 050843418 | 0. 046447996 | 0. 323874325 |
| 0. 925818980 | 0. 796747208 | 0. 318679571 |
| 0. 925745606 | 0. 295653701 | 0. 316137224 |
| 0. 676104665 | 0. 797104716 | 0. 318204641 |
| 0. 671306252 | 0. 295669883 | 0. 318873972 |
| 0. 425828487 | 0. 797213316 | 0. 318138868 |
| 0. 425708473 | 0. 296087325 | 0. 323190928 |
| 0. 175551236 | 0. 797083139 | 0. 318219751 |
| 0. 180136234 | 0. 295665413 | 0. 318882644 |
| 0. 925742924 | 0. 545547366 | 0. 197687998 |
| 0. 925742924 | 0. 045547336 | 0. 197687998 |
| 0. 800742924 | 0. 795547366 | 0. 197687998 |
| 0. 800742924 | 0. 295547336 | 0. 197687998 |
| 0. 675742924 | 0. 545547366 | 0. 197687998 |
| 0. 675742924 | 0. 045547336 | 0. 197687998 |
| 0. 550742924 | 0. 795547366 | 0. 197687998 |
| 0. 550742924 | 0. 295547336 | 0. 197687998 |
| 0. 425742894 | 0. 545547366 | 0. 197687998 |
| 0. 425742894 | 0. 045547336 | 0. 197687998 |
| 0. 300742894 | 0. 795547366 | 0. 197687998 |
| 0. 300742894 | 0. 295547336 | 0. 197687998 |
| 0. 175742909 | 0. 545547366 | 0. 197687998 |
| 0. 175742909 | 0. 045547336 | 0. 197687998 |

|              |              |              |
|--------------|--------------|--------------|
| 0. 050742902 | 0. 795547366 | 0. 197687998 |
| 0. 050742902 | 0. 295547336 | 0. 197687998 |
| 0. 925742924 | 0. 795547366 | 0. 077696726 |
| 0. 925742924 | 0. 295547336 | 0. 077696726 |
| 0. 800742924 | 0. 545547366 | 0. 077696726 |
| 0. 800742924 | 0. 045547336 | 0. 077696726 |
| 0. 675742924 | 0. 795547366 | 0. 077696726 |
| 0. 675742924 | 0. 295547336 | 0. 077696726 |
| 0. 550742924 | 0. 545547366 | 0. 077696726 |
| 0. 550742924 | 0. 045547336 | 0. 077696726 |
| 0. 425742894 | 0. 795547366 | 0. 077696726 |
| 0. 425742894 | 0. 295547336 | 0. 077696726 |
| 0. 300742894 | 0. 545547366 | 0. 077696726 |
| 0. 300742894 | 0. 045547336 | 0. 077696726 |
| 0. 175742909 | 0. 795547366 | 0. 077696726 |
| 0. 175742909 | 0. 295547336 | 0. 077696726 |
| 0. 050742902 | 0. 545547366 | 0. 077696726 |
| 0. 050742902 | 0. 045547336 | 0. 077696726 |
| 0. 798643231 | 0. 545923173 | 0. 491682440 |
| 0. 801196814 | 0. 045294974 | 0. 490599453 |
| 0. 538159728 | 0. 535671532 | 0. 489882499 |
| 0. 550792456 | 0. 047712609 | 0. 490267694 |
| 0. 313508272 | 0. 535590351 | 0. 489915460 |
| 0. 300874472 | 0. 047674548 | 0. 490270883 |
| 0. 052933697 | 0. 545998275 | 0. 491698384 |
| 0. 050465345 | 0. 045254171 | 0. 490588158 |
| 0. 925732672 | 0. 889815152 | 0. 448033839 |
| 0. 925746322 | 0. 702175736 | 0. 451235205 |
| 0. 925845325 | 0. 392202705 | 0. 447690934 |
| 0. 925831556 | 0. 202792436 | 0. 447911322 |
| 0. 676447749 | 0. 890820384 | 0. 448255599 |
| 0. 673658133 | 0. 702431202 | 0. 452208668 |
| 0. 680831611 | 0. 395505488 | 0. 442964047 |
| 0. 678644657 | 0. 203911319 | 0. 448826224 |
| 0. 425744772 | 0. 891069233 | 0. 449357957 |
| 0. 425703526 | 0. 702545524 | 0. 448336124 |
| 0. 425794244 | 0. 398174405 | 0. 433090329 |
| 0. 425839514 | 0. 202811912 | 0. 444330454 |
| 0. 175009549 | 0. 890856862 | 0. 448250592 |
| 0. 177843139 | 0. 702455938 | 0. 452233642 |
| 0. 170931950 | 0. 395465434 | 0. 443134964 |
| 0. 173070103 | 0. 203887209 | 0. 448953658 |
| 0. 800868034 | 0. 551889122 | 0. 396178156 |
| 0. 800980270 | 0. 046924777 | 0. 394570857 |

|              |              |              |
|--------------|--------------|--------------|
| 0. 556667268 | 0. 557320595 | 0. 393142253 |
| 0. 551740706 | 0. 044582158 | 0. 394573510 |
| 0. 294824213 | 0. 557217121 | 0. 393150270 |
| 0. 299902737 | 0. 044616625 | 0. 394572169 |
| 0. 050742496 | 0. 551793575 | 0. 396206677 |
| 0. 050712369 | 0. 047069702 | 0. 394568264 |
| 0. 800297678 | 0. 793902040 | 0. 368753344 |
| 0. 802333176 | 0. 294836730 | 0. 366530895 |
| 0. 551041782 | 0. 795315385 | 0. 368239462 |
| 0. 554190636 | 0. 294429123 | 0. 368444383 |
| 0. 300550908 | 0. 795346022 | 0. 368247002 |
| 0. 297326535 | 0. 294421792 | 0. 368459225 |
| 0. 051274240 | 0. 793860257 | 0. 368765324 |
| 0. 049253259 | 0. 294826955 | 0. 366580635 |
| 0. 925799370 | 0. 946195900 | 0. 320856690 |
| 0. 925730109 | 0. 645623088 | 0. 320053488 |
| 0. 925722361 | 0. 448376566 | 0. 321245044 |
| 0. 925784051 | 0. 144631952 | 0. 319075197 |
| 0. 676186264 | 0. 946287036 | 0. 320321321 |
| 0. 676902890 | 0. 646180034 | 0. 318444073 |
| 0. 676146269 | 0. 448999137 | 0. 320691794 |
| 0. 676060557 | 0. 144101322 | 0. 319376916 |
| 0. 425789118 | 0. 946353197 | 0. 320284665 |
| 0. 425726712 | 0. 646281362 | 0. 318798542 |
| 0. 425741464 | 0. 450003892 | 0. 321750700 |
| 0. 425779283 | 0. 144032151 | 0. 320464134 |
| 0. 175378114 | 0. 946271718 | 0. 320353508 |
| 0. 174576938 | 0. 646165133 | 0. 318483174 |
| 0. 175281972 | 0. 448986828 | 0. 320676297 |
| 0. 175515562 | 0. 144091815 | 0. 319365889 |
| 0. 801465750 | 0. 796603143 | 0. 272625029 |
| 0. 799607813 | 0. 297226876 | 0. 271817029 |
| 0. 550966442 | 0. 796459138 | 0. 272446156 |
| 0. 548421443 | 0. 297371268 | 0. 272844374 |
| 0. 300660908 | 0. 796460807 | 0. 272454739 |
| 0. 303093493 | 0. 297362089 | 0. 272843182 |
| 0. 050146502 | 0. 796597719 | 0. 272636205 |
| 0. 051880717 | 0. 297206193 | 0. 271835625 |
| 0. 800742924 | 0. 545547366 | 0. 244532660 |
| 0. 800742924 | 0. 045547336 | 0. 244532660 |
| 0. 550742924 | 0. 545547366 | 0. 244532660 |
| 0. 550742924 | 0. 045547336 | 0. 244532660 |
| 0. 300742894 | 0. 545547366 | 0. 244532660 |
| 0. 300742894 | 0. 045547336 | 0. 244532660 |

|              |              |              |
|--------------|--------------|--------------|
| 0. 050742902 | 0. 545547366 | 0. 244532660 |
| 0. 050742902 | 0. 045547336 | 0. 244532660 |
| 0. 925742924 | 0. 893147469 | 0. 197687998 |
| 0. 925742924 | 0. 697947204 | 0. 197687998 |
| 0. 925742924 | 0. 393147469 | 0. 197687998 |
| 0. 925742924 | 0. 197947204 | 0. 197687998 |
| 0. 675742924 | 0. 893147469 | 0. 197687998 |
| 0. 675742924 | 0. 697947204 | 0. 197687998 |
| 0. 675742924 | 0. 393147469 | 0. 197687998 |
| 0. 675742924 | 0. 197947204 | 0. 197687998 |
| 0. 425742894 | 0. 893147469 | 0. 197687998 |
| 0. 425742894 | 0. 697947204 | 0. 197687998 |
| 0. 425742894 | 0. 393147469 | 0. 197687998 |
| 0. 425742894 | 0. 197947204 | 0. 197687998 |
| 0. 175742909 | 0. 893147469 | 0. 197687998 |
| 0. 175742909 | 0. 697947204 | 0. 197687998 |
| 0. 175742909 | 0. 393147469 | 0. 197687998 |
| 0. 175742909 | 0. 197947204 | 0. 197687998 |
| 0. 800742924 | 0. 545547366 | 0. 150843352 |
| 0. 800742924 | 0. 045547336 | 0. 150843352 |
| 0. 550742924 | 0. 545547366 | 0. 150843352 |
| 0. 550742924 | 0. 045547336 | 0. 150843352 |
| 0. 300742894 | 0. 545547366 | 0. 150843352 |
| 0. 300742894 | 0. 045547336 | 0. 150843352 |
| 0. 050742902 | 0. 545547366 | 0. 150843352 |
| 0. 050742902 | 0. 045547336 | 0. 150843352 |
| 0. 800742924 | 0. 795547366 | 0. 124541380 |
| 0. 800742924 | 0. 295547336 | 0. 124541380 |
| 0. 550742924 | 0. 795547366 | 0. 124541380 |
| 0. 550742924 | 0. 295547336 | 0. 124541380 |
| 0. 300742894 | 0. 795547366 | 0. 124541380 |
| 0. 300742894 | 0. 295547336 | 0. 124541380 |
| 0. 050742902 | 0. 795547366 | 0. 124541380 |
| 0. 050742902 | 0. 295547336 | 0. 124541380 |
| 0. 925742924 | 0. 947947204 | 0. 077696726 |
| 0. 925742924 | 0. 643147469 | 0. 077696726 |
| 0. 925742924 | 0. 447947204 | 0. 077696726 |
| 0. 925742924 | 0. 143147469 | 0. 077696726 |
| 0. 675742924 | 0. 947947204 | 0. 077696726 |
| 0. 675742924 | 0. 643147469 | 0. 077696726 |
| 0. 675742924 | 0. 447947204 | 0. 077696726 |
| 0. 675742924 | 0. 143147469 | 0. 077696726 |
| 0. 425742894 | 0. 947947204 | 0. 077696726 |
| 0. 425742894 | 0. 643147469 | 0. 077696726 |

|             |             |             |
|-------------|-------------|-------------|
| 0.425742894 | 0.447947204 | 0.077696726 |
| 0.425742894 | 0.143147469 | 0.077696726 |
| 0.175742909 | 0.947947204 | 0.077696726 |
| 0.175742909 | 0.643147469 | 0.077696726 |
| 0.175742909 | 0.447947204 | 0.077696726 |
| 0.175742909 | 0.143147469 | 0.077696726 |
| 0.800742924 | 0.795547366 | 0.030852064 |
| 0.800742924 | 0.295547336 | 0.030852064 |
| 0.550742924 | 0.795547366 | 0.030852064 |
| 0.550742924 | 0.295547336 | 0.030852064 |
| 0.300742894 | 0.795547366 | 0.030852064 |
| 0.300742894 | 0.295547336 | 0.030852064 |
| 0.050742902 | 0.795547366 | 0.030852064 |
| 0.050742902 | 0.295547336 | 0.030852064 |
| 0.318941355 | 0.331587672 | 0.515278697 |
| 0.533328652 | 0.331774503 | 0.515200615 |
| 0.426007181 | 0.443626314 | 0.536619782 |

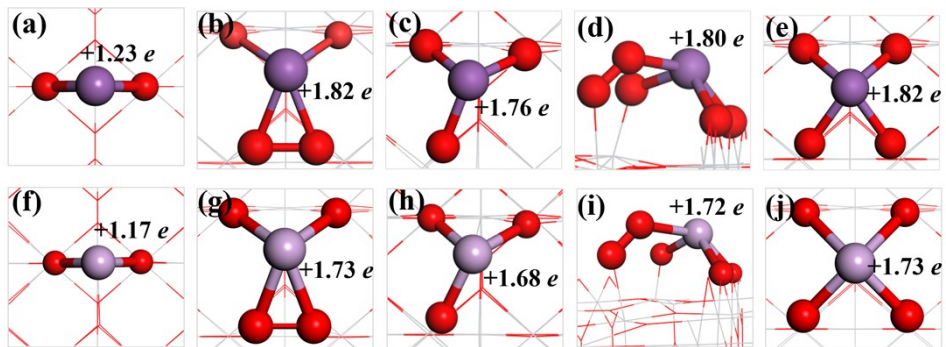

**Figure S8.** The oxidation state of Sb reactive site in (a) Sb<sub>1</sub>, (b) SbO<sub>2</sub> motif, (c) SbO<sub>3</sub>, (d) SbO<sub>3</sub>-O<sub>2</sub>, and SbO<sub>4</sub> species on TiO<sub>2</sub>(110). (f)-(g) show the oxidation states of Bi reactive site in Bi<sub>1</sub>, BiO<sub>2</sub>, BiO<sub>3</sub>, BiO<sub>3</sub>-O<sub>2</sub>, and BiO<sub>4</sub> species on TiO<sub>2</sub>(110), respectively.

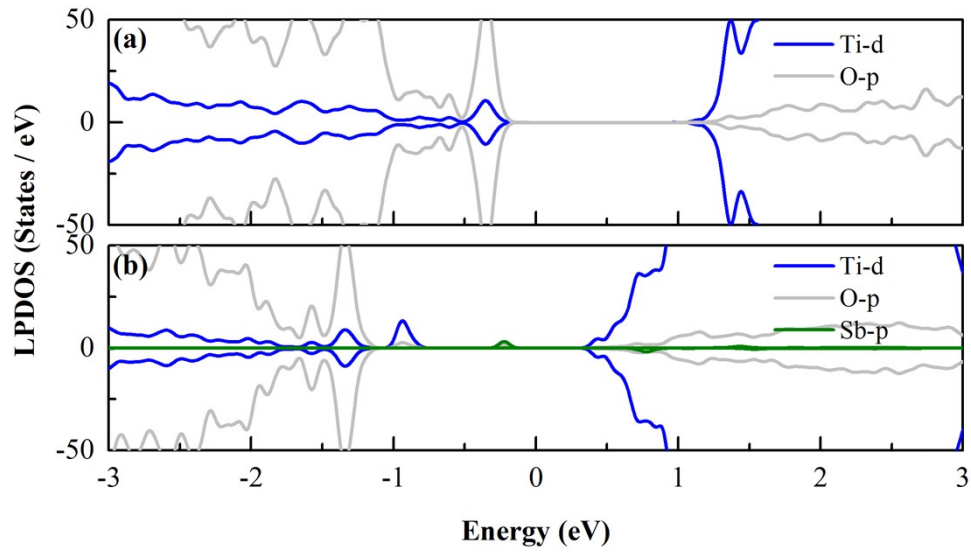

**Figure S9.** Local projected electronic density of states (LPDOS) analysis on **(a)** TiO<sub>2</sub>(110). **(b)** Sb<sub>1</sub>/TiO<sub>2</sub>(110).



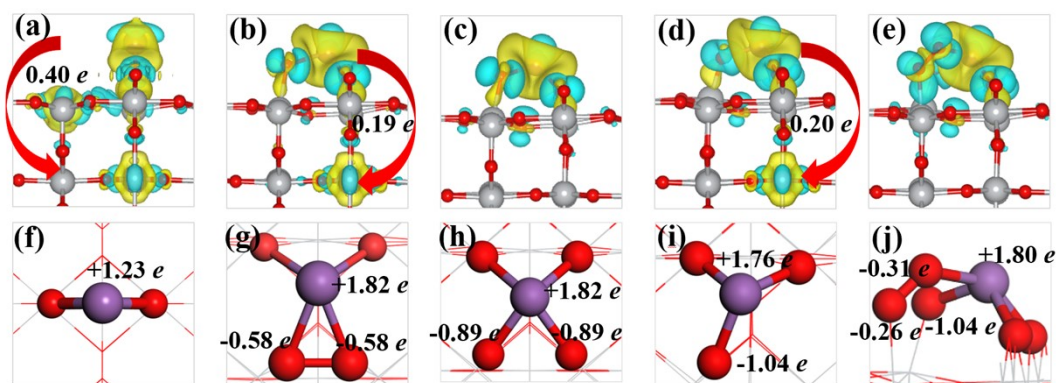

**Fig. S10. Analysis of charge transfer between the SbOx system and TiO<sub>2</sub>** (a)-(e) Side view of differential charge density of Sb<sub>1</sub>/TiO<sub>2</sub>(110), SbO<sub>2</sub> motifs, SbO<sub>4</sub>, SbO<sub>3</sub>, and SbO<sub>3</sub>-O<sub>2</sub> species on TiO<sub>2</sub>(110), respectively, with an isosurface value of  $3 \times 10^{-3} \text{ e}/\text{\AA}^3$ . Yellow and blue bubbles represent charge accumulation and depletion, respectively. (f)-(g) The oxidation state analysis including Sb reactive site and adsorbed O<sub>2</sub> in Sb<sub>1</sub>, SbO<sub>2</sub> motif, SbO<sub>4</sub>, SbO<sub>3</sub>, and SbO<sub>3</sub>-O<sub>2</sub> species on TiO<sub>2</sub>(110), respectively.

First, we note that, in Sb<sub>1</sub>/TiO<sub>2</sub>(110) complex (see Fig. S10(a) and (f)), the Sb single atom donate about 1.23 |e| to the substrate, with about 0.4 |e| is accommodated by the nearby subsurface Ti (Ti<sub>sub</sub>) atoms, as schematically donated by the arrow. As a consequence, there emerges a spin-polarized *d*-orbital state at about 0.95 eV below the Fermi level, see Fig. S5(a). In the optimized SbO<sub>2</sub>/TiO<sub>2</sub>(110) complex (see Fig. S10(b) and (g)), the aforementioned Ti<sub>sub</sub> atom donates about 0.21 |e| back to the adsorbed O<sub>2</sub> molecule, i.e., leaving 0.19 |e| maintained on the Ti<sub>sub</sub>, as reflected by the significantly reduced spin-polarized LPDOS at around 0.24 eV below the Fermi level, see Fig. S5(b). For the case of SbO<sub>4</sub> shown in Fig. S10 (c) and (h), the two O atoms dissociated from the adsorbed O<sub>2</sub> molecule capture more electrons from the substrate, by about 0.62 |e|, with the Ti<sub>sub</sub> atom donating the remained 0.19 |e|, correspondingly, there is already no LPDOS observed on the Ti<sub>sub</sub> within the band gap, see Fig. S5(c).

For the case of SbO<sub>3</sub> species shown in Fig. S10(d) and (i), the left O atom is only charged by about 1.04 |e|, that is, relative to the case of SbO<sub>4</sub>, about 0.74 |e| is back donated to the substrate, correspondingly, there emerge again a new LPDOS of the Ti<sub>sub</sub> at around 0.24 eV below Fermi level, see Fig. S5(d).

Moreover, in the case of SbO<sub>3</sub>-O<sub>2</sub> species on TiO<sub>2</sub>(110) (see Fig. S10 (e) and (j)), relative to the case of SbO<sub>3</sub>, about 0.57 |e| is further transferred to the adsorbed O<sub>2</sub>, mainly by the Ti<sub>sub</sub>. As a consequence, the LPDOS of the Ti<sub>sub</sub> within the band gap disappears, see Fig. S5(e).

**Table. S1** The parameters of magnetic moments analysis for key steps of O<sub>2</sub> dissociation and CO oxidation on the Sb-*p*-SACs, the corresponding key step structures are also shown in (i)-(vii). The data include magnetic moments projected on different species, i.e., Sb, substrate Ti and O<sub>sub</sub>, adsorbed O<sub>2</sub>, and the CO molecule of the systems during the key cycle steps of O<sub>2</sub> activation and CO oxidation.

| Steps            | Magnetic moments ( $\mu_B$ ) |       |        |             |       |        |             |
|------------------|------------------------------|-------|--------|-------------|-------|--------|-------------|
|                  | i                            | ii    | iii    | iv          | v     | vi     | vii         |
| Sb               | 0.00                         | 0.00  | -0.011 | 0.004       | 0.00  | 0.00   | 0.023       |
| O <sub>2</sub>   | 0.00                         | 0.19  | 0.967  | 0.459       | 0.00  | 0.965  | 0.148       |
| Ti               | 0.91                         | 0.86  | -0.017 | -0.061      | 0.909 | -0.017 | 0.005       |
| C/O              | \                            | \     | \      | 0.147/0.043 | \     | \      | 0.515/0.295 |
| O <sub>sub</sub> | 0.09                         | -0.05 | 0.061  | 0.408       | 0.091 | 0.048  | 0.014       |
| Total            | 1.0                          | 1.0   | 1.0    | 1.0         | 1.0   | 1.0    | 1.0         |

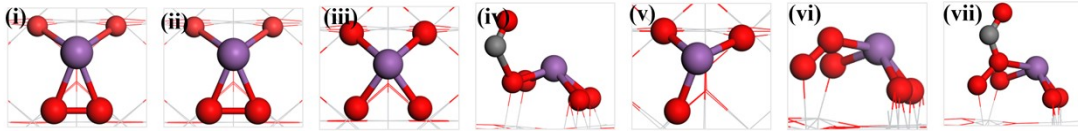

Supplement: d4cp00352g1.pdf [file d4cp00352g1.pdf]
